# Supplementary material for: Lateralized behaviour as indicator of affective state in dairy cows
Source: PLoS One. 2017 Sep 14;12(9):e0184933. doi: 10.1371/journal.pone.0184933 (PMC5599055; doi:10.1371/journal.pone.0184933)
Supplement: S1 dataset — (XLSX) [file pone.0184933.s001.xlsx]

## Sheet: bilateral balloons
bilateral balloons day 1 (n = 158)									bilateral balloons day 2 (n = 162)									bilateral balloons day 3 (n = 160)										legend
date	day	group	cow number	mobility	Head orientation	Contact	Stop position		date	day	group	cow number	Mobility test day	Head orientation	Contact	Stop position		date	day	group	cow number	Mobility test day	Head orientation	Contact	Stop position
2015-03-10	Day 1	HY	45	nl	R	R	O		2015-03-11	Day 2	HY	418	nl	N	N	D		2015-03-12	Day 3	HY	151	nl	N	R	O			group
2015-03-10	Day 1	HY	418	nl	R	R	O		2015-03-11	Day 2	HY	764	l	L	N	N		2015-03-12	Day 3	HY	418	nl	N	N	D			HY	high yielding cow
2015-03-10	Day 1	HY	857	l	R	R	O		2015-03-11	Day 2	HY	291	nl	N	R	N		2015-03-12	Day 3	HY	979	nl	N	L	O			LY	low yielding cow
2015-03-10	Day 1	HY	922	nl	L	N	D		2015-03-11	Day 2	HY	164	nl	N	N	N		2015-03-12	Day 3	HY	1075	nl	R	R	N			mobility
2015-03-10	Day 1	HY	164	nl	R	R	D		2015-03-11	Day 2	HY	497	nl	R	N	N		2015-03-12	Day 3	HY	9689	nl	R	N	N			nl	non-lame
2015-03-10	Day 1	HY	285	nl	R	R	O		2015-03-11	Day 2	HY	448	nl	L	L	O		2015-03-12	Day 3	HY	90	nl	R	N	N			l	lame
2015-03-10	Day 1	HY	501	nl	R	N	D		2015-03-11	Day 2	HY	931	nl	N	L	D		2015-03-12	Day 3	HY	164	nl	N	N	N			head orientation (towards objects)
2015-03-10	Day 1	HY	29	nl	R	R	O		2015-03-11	Day 2	HY	9689	nl	N	R	O		2015-03-12	Day 3	HY	9144	nl	N	R	N			N	neutral
2015-03-10	Day 1	HY	9120	nl	N	L	D		2015-03-11	Day 2	HY	9120	nl	N	R	O		2015-03-12	Day 3	HY	922	nl	N	N	D			R	right orientation
2015-03-10	Day 1	HY	9142	nl	N	N	D		2015-03-11	Day 2	HY	902	nl	N	N	N		2015-03-12	Day 3	HY	285	nl	N	R	O			L	left orientation
2015-03-10	Day 1	HY	979	nl	R	R	O		2015-03-11	Day 2	HY	496	nl	N	N	N		2015-03-12	Day 3	HY	943	nl	R	R	O			Contact (with object)
2015-03-10	Day 1	HY	448	nl	R	R	N		2015-03-11	Day 2	HY	90	nl	N	R	D		2015-03-12	Day 3	HY	757	l	R	R	O			N	no contact with objects
2015-03-10	Day 1	HY	291	nl	R	R	O		2015-03-11	Day 2	HY	969	nl	N	R	O		2015-03-12	Day 3	HY	497	nl	N	L	O			R	contact with right object
2015-03-10	Day 1	HY	89	nl	N	R	O		2015-03-11	Day 2	HY	857	l	R	R	O		2015-03-12	Day 3	HY	794	nl	N	N	N			L	contact with left object
2015-03-10	Day 1	HY	161	nl	R	R	O		2015-03-11	Day 2	HY	28	nl	L	N	N		2015-03-12	Day 3	HY	291	nl	N	L	D			stop position
2015-03-10	Day 1	HY	1121	nl	R	R	N		2015-03-11	Day 2	HY	285	nl	N	L	O		2015-03-12	Day 3	HY	1052	nl	N	N	N			N	no stop
2015-03-10	Day 1	HY	785	l	N	R	O		2015-03-11	Day 2	HY	1052	nl	N	N	N		2015-03-12	Day 3	HY	3	l	N	R	O			O	stop at objects
2015-03-10	Day 1	HY	9144	nl	N	L	D		2015-03-11	Day 2	HY	297	nl	R	R	O		2015-03-12	Day 3	HY	26	nl	R	R	D			D	stop at distance to objects
2015-03-10	Day 1	HY	284	l	N	R	O		2015-03-11	Day 2	HY	922	nl	R	N	D		2015-03-12	Day 3	HY	9120	nl	N	R	O
2015-03-10	Day 1	HY	687	l	R	R	N		2015-03-11	Day 2	HY	177	nl	N	N	N		2015-03-12	Day 3	HY	931	nl	N	L	O
2015-03-10	Day 1	HY	962	l	R	L	D		2015-03-11	Day 2	HY	56	l	N	L	O		2015-03-12	Day 3	HY	788	nl	N	N	N
2015-03-10	Day 1	HY	177	nl	L	N	N		2015-03-11	Day 2	HY	72	nl	L	L	O		2015-03-12	Day 3	HY	785	l	N	N	N
2015-03-10	Day 1	HY	496	nl	L	L	D		2015-03-11	Day 2	HY	785	l	L	N	N		2015-03-12	Day 3	HY	448	nl	L	N	N
2015-03-10	Day 1	HY	9386	nl	N	N	D		2015-03-11	Day 2	HY	793	l	R	N	N		2015-03-12	Day 3	HY	857	l	R	N	N
2015-03-10	Day 1	HY	497	nl	N	R	O		2015-03-11	Day 2	HY	45	nl	R	R	O		2015-03-12	Day 3	HY	190	nl	R	R	O
2015-03-10	Day 1	HY	943	nl	N	L	O		2015-03-11	Day 2	HY	943	nl	N	N	N		2015-03-12	Day 3	HY	30	nl	N	R	O
2015-03-10	Day 1	HY	1057	nl	N	R	O		2015-03-11	Day 2	HY	312	l	N	N	D		2015-03-12	Day 3	HY	45	nl	N	N	N
2015-03-10	Day 1	HY	739	nl	N	N	N		2015-03-11	Day 2	HY	29	nl	N	N	N		2015-03-12	Day 3	HY	72	nl	N	N	N
2015-03-10	Day 1	HY	72	nl	N	L	O		2015-03-11	Day 2	HY	979	nl	N	L	O		2015-03-12	Day 3	HY	764	l	L	L	N
2015-03-10	Day 1	HY	764	l	L	L	N		2015-03-11	Day 2	HY	518	l	N	L	O		2015-03-12	Day 3	HY	29	nl	N	L	O
2015-03-10	Day 1	HY	56	l	N	L	O		2015-03-11	Day 2	HY	89	nl	L	L	D		2015-03-12	Day 3	HY	161	nl	L	L	N
2015-03-10	Day 1	HY	9208	nl	L	L	N		2015-03-11	Day 2	HY	962	l	N	R	O		2015-03-12	Day 3	HY	577	l	N	N	N
2015-03-10	Day 1	HY	127	nl	R	R	O		2015-03-11	Day 2	HY	1121	nl	N	N	N		2015-03-12	Day 3	HY	793	l	N	N	N
2015-03-10	Day 1	HY	793	l	N	R	O		2015-03-11	Day 2	HY	9208	nl	N	L	N		2015-03-12	Day 3	HY	9163	nl	R	N	N
2015-03-10	Day 1	HY	1114	nl	N	R	D		2015-03-11	Day 2	HY	9204	nl	R	R	N		2015-03-12	Day 3	HY	127	nl	N	N	N
2015-03-10	Day 1	HY	162	nl	N	L	D		2015-03-11	Day 2	HY	1057	nl	R	R	N		2015-03-12	Day 3	HY	89	nl	N	L	O
2015-03-10	Day 1	HY	9163	nl	N	R	O		2015-03-11	Day 2	HY	34	l	N	R	N		2015-03-12	Day 3	HY	312	l	N	N	N
2015-03-10	Day 1	HY	9204	nl	N	N	N		2015-03-11	Day 2	HY	788	nl	R	N	N		2015-03-12	Day 3	HY	518	l	L	L	O
2015-03-10	Day 1	HY	757	l	R	L	O		2015-03-11	Day 2	HY	1075	nl	N	R	N		2015-03-12	Day 3	HY	962	l	N	N	N
2015-03-10	Day 1	HY	158	nl	N	R	O		2015-03-11	Day 2	HY	30	nl	N	N	O		2015-03-12	Day 3	HY	9208	nl	N	L	O
2015-03-10	Day 1	HY	794	nl	N	R	O		2015-03-11	Day 2	HY	762	nl	R	N	N		2015-03-12	Day 3	HY	28	nl	N	L	O
2015-03-10	Day 1	HY	34	l	N	R	N		2015-03-11	Day 2	HY	151	nl	N	R	O		2015-03-12	Day 3	HY	496	nl	N	N	N
2015-03-10	Day 1	HY	1052	nl	N	N	D		2015-03-11	Day 2	HY	3	l	N	R	O		2015-03-12	Day 3	HY	56	l	N	L	O
2015-03-10	Day 1	HY	762	nl	R	R	D		2015-03-11	Day 2	HY	955	nl	N	N	D		2015-03-12	Day 3	HY	862	nl	N	R	N
2015-03-10	Day 1	HY	788	nl	N	R	O		2015-03-11	Day 2	HY	9144	nl	L	L	O		2015-03-12	Day 3	HY	969	nl	L	L	N
2015-03-10	Day 1	HY	518	l	R	L	O		2015-03-11	Day 2	HY	284	l	R	R	O		2015-03-12	Day 3	HY	1057	nl	N	N	N
2015-03-10	Day 1	HY	30	nl	N	R	O		2015-03-11	Day 2	HY	124	nl	N	N	D		2015-03-12	Day 3	HY	162	nl	N	N	N
2015-03-10	Day 1	HY	969	nl	R	R	O		2015-03-11	Day 2	HY	158	nl	R	R	N		2015-03-12	Day 3	HY	284	l	L	L	O
2015-03-10	Day 1	HY	1075	nl	N	N	N		2015-03-11	Day 2	HY	9163	nl	N	R	N		2015-03-12	Day 3	HY	955	nl	N	L	D
2015-03-10	Day 1	HY	3	l	R	R	O		2015-03-11	Day 2	HY	18	nl	L	N	N		2015-03-12	Day 3	HY	124	nl	N	N	N
2015-03-10	Day 1	HY	124	nl	R	R	O		2015-03-11	Day 2	HY	757	l	N	L	N		2015-03-12	Day 3	HY	137	nl	N	N	N
2015-03-10	Day 1	HY	955	nl	N	L	O		2015-03-11	Day 2	HY	9386	nl	N	N	N		2015-03-12	Day 3	HY	9204	nl	N	N	N
2015-03-10	Day 1	HY	931	nl	L	L	O		2015-03-11	Day 2	HY	137	nl	N	N	N		2015-03-12	Day 3	HY	902	nl	L	N	N
2015-03-10	Day 1	HY	312	l	N	L	O		2015-03-11	Day 2	HY	169	nl	N	L	O		2015-03-12	Day 3	HY	141	nl	N	N	N
2015-03-10	Day 1	HY	141	nl	N	R	O		2015-03-11	Day 2	HY	125	nl	N	R	N		2015-03-12	Day 3	HY	739	nl	N	N	N
2015-03-10	Day 1	HY	410	nl	N	R	O		2015-03-11	Day 2	HY	410	nl	N	N	N		2015-03-12	Day 3	HY	125	nl	R	N	N
2015-03-10	Day 1	HY	577	l	N	R	O		2015-03-11	Day 2	HY	141	nl	N	R	O		2015-03-12	Day 3	HY	944	nl	N	L	O
2015-03-10	Day 1	HY	137	nl	N	N	D		2015-03-11	Day 2	HY	1114	nl	R	R	O		2015-03-12	Day 3	HY	18	nl	N	L	N
2015-03-10	Day 1	HY	986	nl	N	L	D		2015-03-11	Day 2	HY	862	nl	R	R	O		2015-03-12	Day 3	HY	1121	nl	N	N	N
2015-03-10	Day 1	HY	902	nl	N	R	N		2015-03-11	Day 2	HY	924	nl	N	N	N		2015-03-12	Day 3	HY	34	l	N	R	O
2015-03-10	Day 1	HY	125	nl	N	R	N		2015-03-11	Day 2	HY	577	l	R	R	N		2015-03-12	Day 3	HY	929	nl	L	L	D
2015-03-10	Day 1	HY	28	nl	N	L	O		2015-03-11	Day 2	HY	986	nl	N	R	O		2015-03-12	Day 3	HY	9386	nl	N	N	N
2015-03-10	Day 1	HY	18	nl	L	L	O		2015-03-11	Day 2	HY	1061	nl	N	R	N		2015-03-12	Day 3	HY	169	nl	L	N	N
2015-03-10	Day 1	HY	753	nl	N	N	N		2015-03-11	Day 2	HY	921	nl	N	N	D		2015-03-12	Day 3	HY	921	nl	L	N	D
2015-03-10	Day 1	HY	742	nl	R	N	N		2015-03-11	Day 2	HY	190	nl	R	R	O		2015-03-12	Day 3	HY	948	nl	N	L	O
2015-03-10	Day 1	HY	90	nl	L	R	O		2015-03-11	Day 2	HY	282	nl	N	N	N		2015-03-12	Day 3	HY	1135	nl	N	L	O
2015-03-10	Day 1	HY	151	nl	N	R	O		2015-03-11	Day 2	HY	1082	nl	R	R	D		2015-03-12	Day 3	HY	282	nl	N	N	N
2015-03-10	Day 1	HY	948	nl	R	R	O		2015-03-11	Day 2	HY	760	nl	N	R	O		2015-03-12	Day 3	HY	1061	nl	N	L	N
2015-03-10	Day 1	HY	929	nl	R	N	N		2015-03-11	Day 2	HY	39	nl	N	L	D		2015-03-12	Day 3	HY	1104	nl	N	L	O
2015-03-10	Day 1	HY	1063	nl	N	N	N		2015-03-11	Day 2	HY	687	l	N	N	D		2015-03-12	Day 3	HY	1114	nl	L	N	N
2015-03-10	Day 1	HY	1127	nl	N	L	O		2015-03-11	Day 2	HY	1063	nl	N	R	O		2015-03-12	Day 3	HY	1063	nl	L	R	O
2015-03-10	Day 1	HY	919	l	N	R	O		2015-03-11	Day 2	HY	1104	nl	N	L	D		2015-03-12	Day 3	HY	1079	nl	N	L	O
2015-03-10	Day 1	HY	1135	nl	N	L	O		2015-03-11	Day 2	HY	948	nl	R	R	N		2015-03-12	Day 3	HY	760	nl	N	L	O
2015-03-10	Day 1	HY	1061	nl	R	R	O		2015-03-11	Day 2	HY	1127	nl	N	R	O		2015-03-12	Day 3	HY	1134	nl	N	L	D
2015-03-10	Day 1	HY	1079	nl	N	N	N		2015-03-11	Day 2	HY	1079	nl	N	N	N		2015-03-12	Day 3	HY	1127	nl	N	N	N
2015-03-10	Day 1	HY	1134	nl	L	L	O		2015-03-11	Day 2	HY	1134	nl	L	R	D		2015-03-12	Day 3	HY	1082	nl	R	R	O
2015-03-10	Day 1	HY	282	nl	R	L	O		2015-03-11	Day 2	HY	1089	nl	L	L	O		2015-03-12	Day 3	HY	39	nl	L	L	D
2015-03-10	Day 1	HY	1104	nl	N	R	O		2015-03-11	Day 2	LY	9156	nl	L	L	D		2015-03-12	Day 3	HY	1089	nl	L	R	O
2015-03-10	Day 1	HY	39	nl	L	L	O		2015-03-11	Day 2	LY	9202	nl	R	R	O		2015-03-12	Day 3	LY	680	l	R	L	D
2015-03-10	Day 1	HY	1089	nl	N	L	O		2015-03-11	Day 2	LY	189	nl	L	N	N		2015-03-12	Day 3	LY	197	nl	L	L	D
2015-03-10	Day 1	LY	9156	nl	N	L	D		2015-03-11	Day 2	LY	951	l	N	R	N		2015-03-12	Day 3	LY	1036	nl	N	L	N
2015-03-10	Day 1	LY	1047	nl	N	L	O		2015-03-11	Day 2	LY	1047	nl	N	L	O		2015-03-12	Day 3	LY	786	l	L	L	D
2015-03-10	Day 1	LY	1036	nl	R	R	D		2015-03-11	Day 2	LY	1036	nl	R	L	O		2015-03-12	Day 3	LY	781	l	R	R	N
2015-03-10	Day 1	LY	1035	nl	N	L	N		2015-03-11	Day 2	LY	559	nl	N	L	N		2015-03-12	Day 3	LY	951	l	N	L	N
2015-03-10	Day 1	LY	21	nl	R	R	O		2015-03-11	Day 2	LY	781	l	R	R	N		2015-03-12	Day 3	LY	189	nl	N	N	N
2015-03-10	Day 1	LY	189	nl	R	R	O		2015-03-11	Day 2	LY	121	nl	R	R	N		2015-03-12	Day 3	LY	110	nl	N	L	D
2015-03-10	Day 1	LY	260	nl	N	R	O		2015-03-11	Day 2	LY	25	l	N	N	D		2015-03-12	Day 3	LY	9142	nl	N	R	O
2015-03-10	Day 1	LY	781	l	N	R	N		2015-03-11	Day 2	LY	993	nl	R	N	N		2015-03-12	Day 3	LY	439	nl	R	R	N
2015-03-10	Day 1	LY	878	nl	N	L	N		2015-03-11	Day 2	LY	274	nl	R	R	O		2015-03-12	Day 3	LY	108	nl	R	R	O
2015-03-10	Day 1	LY	9192	nl	N	R	N		2015-03-11	Day 2	LY	9142	nl	R	R	N		2015-03-12	Day 3	LY	878	nl	N	N	D
2015-03-10	Day 1	LY	25	l	N	L	D		2015-03-11	Day 2	LY	9174	nl	L	L	N		2015-03-12	Day 3	LY	958	l	N	N	N
2015-03-10	Day 1	LY	43	nl	N	R	O		2015-03-11	Day 2	LY	9141	l	R	N	N		2015-03-12	Day 3	LY	373	nl	N	N	N
2015-03-10	Day 1	LY	119	nl	R	R	O		2015-03-11	Day 2	LY	108	nl	R	R	O		2015-03-12	Day 3	LY	950	nl	N	N	N
2015-03-10	Day 1	LY	94	nl	R	R	O		2015-03-11	Day 2	LY	48	l	N	N	N		2015-03-12	Day 3	LY	119	nl	R	L	N
2015-03-10	Day 1	LY	195	nl	N	R	O		2015-03-11	Day 2	LY	983	l	N	R	O		2015-03-12	Day 3	LY	9141	l	N	N	N
2015-03-10	Day 1	LY	197	nl	N	R	D		2015-03-11	Day 2	LY	88	nl	N	N	D		2015-03-12	Day 3	LY	983	l	N	L	D
2015-03-10	Day 1	LY	983	l	N	N	D		2015-03-11	Day 2	LY	283	nl	L	L	O		2015-03-12	Day 3	LY	15	nl	N	N	N
2015-03-10	Day 1	LY	9236	nl	R	R	N		2015-03-11	Day 2	LY	198	nl	N	N	D		2015-03-12	Day 3	LY	705	nl	N	N	D
2015-03-10	Day 1	LY	1189	l	R	R	O		2015-03-11	Day 2	LY	119	nl	N	R	N		2015-03-12	Day 3	LY	146	nl	R	R	O
2015-03-10	Day 1	LY	88	nl	N	L	D		2015-03-11	Day 2	LY	43	nl	N	N	N		2015-03-12	Day 3	LY	666	l	N	L	O
2015-03-10	Day 1	LY	108	nl	R	R	O		2015-03-11	Day 2	LY	1035	nl	R	R	O		2015-03-12	Day 3	LY	993	nl	N	N	N
2015-03-10	Day 1	LY	923	l	N	R	O		2015-03-11	Day 2	LY	9236	nl	N	N	N		2015-03-12	Day 3	LY	1016	nl	R	R	O
2015-03-10	Day 1	LY	38	nl	R	R	O		2015-03-11	Day 2	LY	21	nl	N	R	O		2015-03-12	Day 3	LY	708	nl	N	L	O
2015-03-10	Day 1	LY	53	l	R	N	N		2015-03-11	Day 2	LY	15	nl	R	R	O		2015-03-12	Day 3	LY	111	nl	R	R	N
2015-03-10	Day 1	LY	951	l	N	R	O		2015-03-11	Day 2	LY	1189	l	R	R	O		2015-03-12	Day 3	LY	199	l	R	R	O
2015-03-10	Day 1	LY	9202	nl	N	R	O		2015-03-11	Day 2	LY	9192	nl	L	N	N		2015-03-12	Day 3	LY	923	l	R	L	O
2015-03-10	Day 1	LY	559	nl	N	R	O		2015-03-11	Day 2	LY	878	nl	L	N	N		2015-03-12	Day 3	LY	21	nl	L	N	N
2015-03-10	Day 1	LY	121	nl	N	R	O		2015-03-11	Day 2	LY	1034	nl	N	R	O		2015-03-12	Day 3	LY	9156	nl	N	N	N
2015-03-10	Day 1	LY	680	l	R	R	O		2015-03-11	Day 2	LY	38	nl	N	R	D		2015-03-12	Day 3	LY	133	nl	L	N	N
2015-03-10	Day 1	LY	950	nl	N	R	O		2015-03-11	Day 2	LY	197	nl	N	L	N		2015-03-12	Day 3	LY	9192	nl	N	N	N
2015-03-10	Day 1	LY	283	nl	N	L	O		2015-03-11	Day 2	LY	705	nl	N	N	N		2015-03-12	Day 3	LY	1002	nl	N	R	O
2015-03-10	Day 1	LY	1002	nl	N	R	O		2015-03-11	Day 2	LY	485	l	L	N	N		2015-03-12	Day 3	LY	1035	nl	R	R	O
2015-03-10	Day 1	LY	149	nl	N	R	O		2015-03-11	Day 2	LY	23	nl	L	R	O		2015-03-12	Day 3	LY	9218	nl	N	L	O
2015-03-10	Day 1	LY	199	l	L	R	O		2015-03-11	Day 2	LY	680	l	R	R	O		2015-03-12	Day 3	LY	43	nl	N	N	D
2015-03-10	Day 1	LY	146	nl	R	R	O		2015-03-11	Day 2	LY	95	nl	N	R	O		2015-03-12	Day 3	LY	1027	nl	N	N	N
2015-03-10	Day 1	LY	48	l	N	N	N		2015-03-11	Day 2	LY	166	nl	R	R	O		2015-03-12	Day 3	LY	559	nl	N	N	D
2015-03-10	Day 1	LY	485	l	N	L	O		2015-03-11	Day 2	LY	199	l	N	R	O		2015-03-12	Day 3	LY	48	l	N	N	N
2015-03-10	Day 1	LY	9141	l	R	N	D		2015-03-11	Day 2	LY	1090	nl	R	R	O		2015-03-12	Day 3	LY	260	nl	N	L	O
2015-03-10	Day 1	LY	1016	nl	R	R	O		2015-03-11	Day 2	LY	110	nl	R	R	O		2015-03-12	Day 3	LY	38	nl	R	R	N
2015-03-10	Day 1	LY	274	nl	R	R	O		2015-03-11	Day 2	LY	1017	l	L	L	O		2015-03-12	Day 3	LY	121	nl	R	N	N
2015-03-10	Day 1	LY	439	nl	N	R	O		2015-03-11	Day 2	LY	439	nl	N	R	O		2015-03-12	Day 3	LY	283	nl	N	L	O
2015-03-10	Day 1	LY	23	nl	N	N	N		2015-03-11	Day 2	LY	950	nl	N	R	N		2015-03-12	Day 3	LY	195	nl	N	L	O
2015-03-10	Day 1	LY	786	l	N	L	O		2015-03-11	Day 2	LY	958	l	N	N	N		2015-03-12	Day 3	LY	274	nl	N	R	O
2015-03-10	Day 1	LY	166	nl	N	L	O		2015-03-11	Day 2	LY	9178	nl	L	L	N		2015-03-12	Day 3	LY	9202	nl	N	L	O
2015-03-10	Day 1	LY	69	nl	N	N	N		2015-03-11	Day 2	LY	149	nl	N	L	O		2015-03-12	Day 3	LY	23	nl	N	N	N
2015-03-10	Day 1	LY	993	nl	R	R	O		2015-03-11	Day 2	LY	988	nl	N	R	O		2015-03-12	Day 3	LY	1047	nl	N	L	O
2015-03-10	Day 1	LY	1034	nl	R	R	O		2015-03-11	Day 2	LY	192	nl	N	L	O		2015-03-12	Day 3	LY	1034	nl	N	L	N
2015-03-10	Day 1	LY	110	nl	R	R	O		2015-03-11	Day 2	LY	1016	nl	N	R	O		2015-03-12	Day 3	LY	9236	nl	N	N	N
2015-03-10	Day 1	LY	1039	nl	N	L	O		2015-03-11	Day 2	LY	1002	nl	R	R	O		2015-03-12	Day 3	LY	485	l	N	L	O
2015-03-10	Day 1	LY	1090	nl	R	L	O		2015-03-11	Day 2	LY	1039	nl	R	R	O		2015-03-12	Day 3	LY	9175	nl	R	R	N
2015-03-10	Day 1	LY	1042	l	N	L	O		2015-03-11	Day 2	LY	1042	l	N	N	D		2015-03-12	Day 3	LY	165	nl	R	R	N
2015-03-10	Day 1	LY	1017	l	L	L	O		2015-03-11	Day 2	LY	1027	nl	N	L	O		2015-03-12	Day 3	LY	69	nl	N	N	N
2015-03-10	Day 1	LY	705	nl	N	R	O		2015-03-11	Day 2	LY	373	nl	R	N	N		2015-03-12	Day 3	LY	1189	l	N	R	O
2015-03-10	Day 1	LY	192	nl	N	L	D		2015-03-11	Day 2	LY	923	l	R	R	O		2015-03-12	Day 3	LY	25	l	N	N	N
2015-03-10	Day 1	LY	666	l	N	R	O		2015-03-11	Day 2	LY	786	l	N	L	O		2015-03-12	Day 3	LY	88	nl	N	L	N
2015-03-10	Day 1	LY	1027	nl	N	R	O		2015-03-11	Day 2	LY	9183	nl	N	L	O		2015-03-12	Day 3	LY	9174	nl	N	L	O
2015-03-10	Day 1	LY	9183	nl	N	L	O		2015-03-11	Day 2	LY	129	nl	N	R	N		2015-03-12	Day 3	LY	1090	nl	N	R	O
2015-03-10	Day 1	LY	1024	nl	N	R	O		2015-03-11	Day 2	LY	851	nl	N	R	O		2015-03-12	Day 3	LY	129	nl	R	R	N
2015-03-10	Day 1	LY	958	l	N	L	O		2015-03-11	Day 2	LY	666	l	R	R	N		2015-03-12	Day 3	LY	1012	nl	N	L	O
2015-03-10	Day 1	LY	9186	nl	L	L	O		2015-03-11	Day 2	LY	146	nl	R	R	O		2015-03-12	Day 3	LY	851	nl	L	L	N
2015-03-10	Day 1	LY	847	nl	N	L	O		2015-03-11	Day 2	LY	69	nl	N	R	O		2015-03-12	Day 3	LY	1039	nl	R	R	O
2015-03-10	Day 1	LY	47	nl	R	R	O		2015-03-11	Day 2	LY	9186	nl	N	L	D		2015-03-12	Day 3	LY	1017	l	L	L	N
2015-03-10	Day 1	LY	708	nl	N	R	O		2015-03-11	Day 2	LY	847	nl	N	N	N		2015-03-12	Day 3	LY	166	nl	N	L	O
2015-03-10	Day 1	LY	1014	nl	N	R	O		2015-03-11	Day 2	LY	1014	nl	L	N	N		2015-03-12	Day 3	LY	53	l	N	N	N
2015-03-10	Day 1	LY	988	nl	N	R	O		2015-03-11	Day 2	LY	1024	nl	R	R	O		2015-03-12	Day 3	LY	47	nl	N	R	O
2015-03-10	Day 1	LY	15	nl	R	R	O		2015-03-11	Day 2	LY	47	nl	R	R	N		2015-03-12	Day 3	LY	847	nl	N	N	N
2015-03-10	Day 1	LY	9167	nl	L	L	O		2015-03-11	Day 2	LY	1040	nl	R	R	O		2015-03-12	Day 3	LY	1040	nl	R	R	O
2015-03-10	Day 1	LY	1097	nl	N	R	O		2015-03-11	Day 2	LY	919	l	N	R	N		2015-03-12	Day 3	LY	1014	nl	N	N	N
2015-03-10	Day 1	LY	9178	nl	N	L	N		2015-03-11	Day 2	LY	708	nl	N	R	O		2015-03-12	Day 3	LY	155	nl	N	N	N
2015-03-10	Day 1	LY	155	nl	N	L	N		2015-03-11	Day 2	LY	9167	nl	N	R	D		2015-03-12	Day 3	LY	1024	nl	L	L	N
2015-03-10	Day 1	LY	1049	nl	N	L	O		2015-03-11	Day 2	LY	1063	nl	R	R	O		2015-03-12	Day 3	LY	1062	nl	R	R	O
2015-03-10	Day 1	LY	851	nl	N	L	O		2015-03-11	Day 2	LY	9218	nl	R	R	O		2015-03-12	Day 3	LY	1042	l	L	L	N
2015-03-10	Day 1	LY	133	nl	N	L	O		2015-03-11	Day 2	LY	1049	nl	R	R	O		2015-03-12	Day 3	LY	997	l	N	N	N
2015-03-10	Day 1	LY	1040	nl	R	R	O		2015-03-11	Day 2	LY	155	nl	N	R	O		2015-03-12	Day 3	LY	9183	nl	N	L	O
2015-03-10	Day 1	LY	142	l	L	L	O		2015-03-11	Day 2	LY	1048	nl	R	R	O		2015-03-12	Day 3	LY	149	nl	N	L	N
2015-03-10	Day 1	LY	1048	nl	N	L	N		2015-03-11	Day 2	LY	1012	nl	R	R	N		2015-03-12	Day 3	LY	9167	nl	N	L	D
2015-03-10	Day 1	LY	1112	nl	N	N	N		2015-03-11	Day 2	LY	1112	nl	N	N	N		2015-03-12	Day 3	LY	1112	nl	N	N	N
2015-03-10	Day 1	LY	1062	nl	N	R	O		2015-03-11	Day 2	LY	133	nl	N	L	O		2015-03-12	Day 3	LY	988	nl	N	N	N
									2015-03-11	Day 2	LY	1097	nl	N	N	N		2015-03-12	Day 3	LY	919	l	N	L	N
									2015-03-11	Day 2	LY	1098	nl	R	R	N		2015-03-12	Day 3	LY	1048	nl	N	R	N
									2015-03-11	Day 2	LY	142	l	R	N	N
									2015-03-11	Day 2	LY	195	nl	R	R	O

## Sheet: bilateral checkerboards
bilateral checkerboards day 1 (n = 171)									bilateral checkerboards day 2 (n = 168)									bilateral checkerboards day 3 (n = 175)									legend
date	day	group	cow number	mobility	Head orientation	Contact	Stop position		date	day	group	cow number	mobility	Head orientation	Contact	Stop position		date	day	group	cow number	mobility	Head orientation	Contact	Stop position
2015-03-18	Day 1	HY	953	nl	N	R	O		2015-03-19	Day 2	HY	969	nl	N	L	O		2015-03-20	S2D3	HY	1075	nl	N	R	N		group
2015-03-18	Day 1	HY	922	l	N	L	D		2015-03-19	Day 2	HY	151	nl	N	R	O		2015-03-20	S2D3	HY	151	nl	N	N	N		HY	high yielding cow
2015-03-18	Day 1	HY	418	nl	R	N	D		2015-03-19	Day 2	HY	922	l	N	N	N		2015-03-20	S2D3	HY	970	nl	N	L	N		LY	low yielding cow
2015-03-18	Day 1	HY	979	nl	N	R	O		2015-03-19	Day 2	HY	177	nl	N	N	N		2015-03-20	S2D3	HY	922	l	N	N	N		mobility
2015-03-18	Day 1	HY	9689	nl	N	R	O		2015-03-19	Day 2	HY	9689	nl	N	N	N		2015-03-20	S2D3	HY	9689	nl	N	N	D		nl	non-lame
2015-03-18	Day 1	HY	1075	nl	N	R	N		2015-03-19	Day 2	HY	448	nl	L	N	N		2015-03-20	S2D3	HY	497	nl	N	R	D		l	lame
2015-03-18	Day 1	HY	26	l	R	L	O		2015-03-19	Day 2	HY	285	nl	N	L	O		2015-03-20	S2D3	HY	178	l	R	L	N		head orientation (towards objects)
2015-03-18	Day 1	HY	962	l	N	N	D		2015-03-19	Day 2	HY	739	nl	N	L	O		2015-03-20	S2D3	HY	164	l	L	N	N		N	neutral
2015-03-18	Day 1	HY	285	nl	N	L	D		2015-03-19	Day 2	HY	979	nl	N	L	O		2015-03-20	S2D3	HY	56	l	N	N	N		R	right orientation
2015-03-18	Day 1	HY	501	nl	N	N	D		2015-03-19	Day 2	HY	794	nl	N	R	N		2015-03-20	S2D3	HY	28	nl	N	N	N		L	left orientation
2015-03-18	Day 1	HY	9120	nl	R	L	O		2015-03-19	Day 2	HY	161	nl	N	N	N		2015-03-20	S2D3	HY	687	l	N	R	N		Contact (with object)
2015-03-18	Day 1	HY	742	nl	N	L	O		2015-03-19	Day 2	HY	45	nl	N	N	N		2015-03-20	S2D3	HY	979	nl	N	N	D		N	no contact with objects
2015-03-18	Day 1	HY	45	nl	R	R	O		2015-03-19	Day 2	HY	497	nl	N	L	O		2015-03-20	S2D3	HY	944	l	N	N	N		R	contact with right object
2015-03-18	Day 1	HY	925	nl	R	N	D		2015-03-19	Day 2	HY	1121	l	N	N	N		2015-03-20	S2D3	HY	45	nl	N	N	N		L	contact with left object
2015-03-18	Day 1	HY	178	l	R	R	O		2015-03-19	Day 2	HY	742	nl	N	N	N		2015-03-20	S2D3	HY	418	nl	R	N	N		stop position
2015-03-18	Day 1	HY	9204	nl	N	L	D		2015-03-19	Day 2	HY	178	l	R	R	O		2015-03-20	S2D3	HY	1057	nl	N	N	N		N	no stop
2015-03-18	Day 1	HY	497	nl	R	R	O		2015-03-19	Day 2	HY	291	nl	N	N	N		2015-03-20	S2D3	HY	739	nl	N	L	O		O	stop at objects
2015-03-18	Day 1	HY	1052	nl	N	R	O		2015-03-19	Day 2	HY	1052	nl	N	N	N		2015-03-20	S2D3	HY	285	nl	N	R	O		D	stop at distance to objects
2015-03-18	Day 1	HY	291	nl	N	R	O		2015-03-19	Day 2	HY	312	nl	N	L	O		2015-03-20	S2D3	HY	702	nl	R	R	O
2015-03-18	Day 1	HY	1121	l	N	R	O		2015-03-19	Day 2	HY	785	l	R	R	O		2015-03-20	S2D3	HY	788	nl	N	N	N
2015-03-18	Day 1	HY	72	nl	N	R	O		2015-03-19	Day 2	HY	56	l	N	L	O		2015-03-20	S2D3	HY	448	nl	L	N	N
2015-03-18	Day 1	HY	177	nl	N	N	N		2015-03-19	Day 2	HY	764	l	N	R	O		2015-03-20	S2D3	HY	161	nl	N	N	N
2015-03-18	Day 1	HY	785	l	N	L	O		2015-03-19	Day 2	HY	72	nl	N	N	N		2015-03-20	S2D3	HY	9204	nl	N	N	N
2015-03-18	Day 1	HY	162	l	N	L	O		2015-03-19	Day 2	HY	1075	nl	N	R	N		2015-03-20	S2D3	HY	1052	nl	N	N	N
2015-03-18	Day 1	HY	89	nl	L	L	O		2015-03-19	Day 2	HY	169	nl	N	N	N		2015-03-20	S2D3	HY	953	nl	N	L	O
2015-03-18	Day 1	HY	762	l	R	R	O		2015-03-19	Day 2	HY	953	nl	N	N	N		2015-03-20	S2D3	HY	312	nl	N	N	N
2015-03-18	Day 1	HY	190	nl	N	L	O		2015-03-19	Day 2	HY	26	l	R	N	N		2015-03-20	S2D3	HY	90	nl	N	L	O
2015-03-18	Day 1	HY	158	nl	N	R	O		2015-03-19	Day 2	HY	962	l	N	L	O		2015-03-20	S2D3	HY	764	l	L	L	O
2015-03-18	Day 1	HY	312	nl	N	N	D		2015-03-19	Day 2	HY	9204	nl	N	L	N		2015-03-20	S2D3	HY	89	nl	R	L	N
2015-03-18	Day 1	HY	448	nl	N	L	O		2015-03-19	Day 2	HY	925	nl	N	N	N		2015-03-20	S2D3	HY	26	l	L	L	N
2015-03-18	Day 1	HY	518	nl	L	L	D		2015-03-19	Day 2	HY	793	l	N	N	N		2015-03-20	S2D3	HY	1114	nl	N	N	N
2015-03-18	Day 1	HY	793	l	N	L	O		2015-03-19	Day 2	HY	9144	nl	N	L	N		2015-03-20	S2D3	HY	9208	nl	N	N	N
2015-03-18	Day 1	HY	90	nl	R	R	O		2015-03-19	Day 2	HY	757	nl	N	N	N		2015-03-20	S2D3	HY	793	l	L	L	O
2015-03-18	Day 1	HY	948	nl	N	N	D		2015-03-19	Day 2	HY	158	nl	R	R	O		2015-03-20	S2D3	HY	9144	nl	N	R	N
2015-03-18	Day 1	HY	764	l	N	L	O		2015-03-19	Day 2	HY	518	nl	N	L	O		2015-03-20	S2D3	HY	9163	nl	N	R	N
2015-03-18	Day 1	HY	9144	nl	R	R	O		2015-03-19	Day 2	HY	9120	nl	N	L	O		2015-03-20	S2D3	HY	158	nl	N	N	N
2015-03-18	Day 1	HY	788	nl	N	L	O		2015-03-19	Day 2	HY	164	l	N	N	N		2015-03-20	S2D3	HY	137	nl	N	N	N
2015-03-18	Day 1	HY	9163	nl	R	R	O		2015-03-19	Day 2	HY	30	l	N	N	N		2015-03-20	S2D3	HY	501	nl	N	L	N
2015-03-18	Day 1	HY	410	nl	N	L	O		2015-03-19	Day 2	HY	788	nl	N	R	O		2015-03-20	S2D3	HY	284	nl	N	N	N
2015-03-18	Day 1	HY	757	nl	R	N	O		2015-03-19	Day 2	HY	943	nl	N	N	N		2015-03-20	S2D3	HY	34	l	N	L	O
2015-03-18	Day 1	HY	28	nl	L	L	O		2015-03-19	Day 2	HY	762	l	N	N	N		2015-03-20	S2D3	HY	291	nl	N	N	N
2015-03-18	Day 1	HY	164	l	N	L	O		2015-03-19	Day 2	HY	190	nl	N	N	N		2015-03-20	S2D3	HY	1121	l	N	R	O
2015-03-18	Day 1	HY	1061	nl	N	L	O		2015-03-19	Day 2	HY	90	nl	R	N	N		2015-03-20	S2D3	HY	9120	nl	N	N	N
2015-03-18	Day 1	HY	749	nl	R	R	O		2015-03-19	Day 2	HY	955	nl	N	N	N		2015-03-20	S2D3	HY	177	nl	N	N	N
2015-03-18	Day 1	HY	921	l	R	R	O		2015-03-19	Day 2	HY	862	nl	N	R	O		2015-03-20	S2D3	HY	749	nl	N	R	O
2015-03-18	Day 1	HY	943	nl	R	R	O		2015-03-19	Day 2	HY	1061	nl	N	L	O		2015-03-20	S2D3	HY	518	nl	L	L	O
2015-03-18	Day 1	HY	1057	nl	N	N	N		2015-03-19	Day 2	HY	1057	nl	N	N	N		2015-03-20	S2D3	HY	962	l	N	R	D
2015-03-18	Day 1	HY	969	nl	N	L	O		2015-03-19	Day 2	HY	34	l	N	N	N		2015-03-20	S2D3	HY	785	l	N	N	N
2015-03-18	Day 1	HY	56	l	R	L	O		2015-03-19	Day 2	HY	9163	nl	R	N	N		2015-03-20	S2D3	HY	762	l	N	N	N
2015-03-18	Day 1	HY	857	l	N	R	D		2015-03-19	Day 2	HY	654	nl	N	N	N		2015-03-20	S2D3	HY	169	nl	N	N	N
2015-03-18	Day 1	HY	137	nl	N	N	N		2015-03-19	Day 2	HY	284	nl	N	N	N		2015-03-20	S2D3	HY	943	nl	R	R	O
2015-03-18	Day 1	HY	3	l	R	R	O		2015-03-19	Day 2	HY	410	nl	N	N	N		2015-03-20	S2D3	HY	3	l	N	L	O
2015-03-18	Day 1	HY	931	nl	N	L	O		2015-03-19	Day 2	HY	948	nl	N	N	N		2015-03-20	S2D3	HY	857	l	N	N	N
2015-03-18	Day 1	HY	902	nl	R	R	O		2015-03-19	Day 2	HY	141	l	N	N	N		2015-03-20	S2D3	HY	862	nl	N	N	N
2015-03-18	Day 1	HY	9386	nl	R	R	O		2015-03-19	Day 2	HY	162	l	N	N	N		2015-03-20	S2D3	HY	141	l	N	N	N
2015-03-18	Day 1	HY	18	nl	N	L	O		2015-03-19	Day 2	HY	577	l	N	N	N		2015-03-20	S2D3	HY	72	nl	N	N	N
2015-03-18	Day 1	HY	284	nl	N	L	O		2015-03-19	Day 2	HY	125	nl	N	N	N		2015-03-20	S2D3	HY	1061	nl	N	L	O
2015-03-18	Day 1	HY	124	nl	R	R	O		2015-03-19	Day 2	HY	1144	nl	N	R	O		2015-03-20	S2D3	HY	577	l	N	N	N
2015-03-18	Day 1	HY	794	nl	N	R	O		2015-03-19	Day 2	HY	9208	nl	N	N	N		2015-03-20	S2D3	HY	969	nl	N	R	N
2015-03-18	Day 1	HY	141	l	N	L	O		2015-03-19	Day 2	HY	1114	nl	N	N	N		2015-03-20	S2D3	HY	282	nl	N	N	N
2015-03-18	Day 1	HY	955	nl	N	L	O		2015-03-19	Day 2	HY	687	l	R	R	O		2015-03-20	S2D3	HY	125	nl	N	L	N
2015-03-18	Day 1	HY	862	nl	N	R	O		2015-03-19	Day 2	HY	931	nl	N	N	N		2015-03-20	S2D3	HY	757	nl	N	N	N
2015-03-18	Day 1	HY	169	nl	N	L	O		2015-03-19	Day 2	HY	753	nl	N	N	N		2015-03-20	S2D3	HY	9386	nl	R	N	N
2015-03-18	Day 1	HY	944	l	N	N	N		2015-03-19	Day 2	HY	1079	nl	N	R	N		2015-03-20	S2D3	HY	955	nl	N	L	O
2015-03-18	Day 1	HY	30	l	R	R	O		2015-03-19	Day 2	HY	857	l	N	N	N		2015-03-20	S2D3	HY	410	nl	N	N	N
2015-03-18	Day 1	HY	39	nl	N	R	D		2015-03-19	Day 2	HY	929	l	N	L	O		2015-03-20	S2D3	HY	931	nl	N	L	O
2015-03-18	Day 1	HY	9208	nl	N	R	O		2015-03-19	Day 2	HY	1063	nl	N	N	N		2015-03-20	S2D3	HY	30	l	R	N	N
2015-03-18	Day 1	HY	1063	nl	N	L	O		2015-03-19	Day 2	HY	1127	nl	N	N	N		2015-03-20	S2D3	HY	162	l	N	N	N
2015-03-18	Day 1	HY	1104	nl	N	N	N		2015-03-19	Day 2	HY	127	nl	N	N	N		2015-03-20	S2D3	HY	929	l	L	L	O
2015-03-18	Day 1	HY	1082	nl	R	R	O		2015-03-19	Day 2	HY	1082	nl	R	N	N		2015-03-20	S2D3	HY	190	nl	N	N	N
2015-03-18	Day 1	HY	1135	nl	N	L	O		2015-03-19	Day 2	HY	944	l	N	N	N		2015-03-20	S2D3	HY	753	nl	N	N	N
2015-03-18	Day 1	HY	282	nl	R	R	O		2015-03-19	Day 2	HY	902	nl	N	R	O		2015-03-20	S2D3	HY	1135	nl	L	N	N
2015-03-18	Day 1	HY	114	nl	N	R	O		2015-03-19	Day 2	HY	921	l	N	N	N		2015-03-20	S2D3	HY	794	nl	N	N	N
2015-03-18	Day 1	HY	151	nl	R	R	O		2015-03-19	Day 2	HY	418	nl	N	N	N		2015-03-20	S2D3	HY	124	nl	R	R	N
2015-03-18	Day 1	HY	125	nl	R	R	O		2015-03-19	Day 2	HY	760	nl	N	R	O		2015-03-20	S2D3	HY	1082	nl	R	N	N
2015-03-18	Day 1	HY	1079	nl	N	R	O		2015-03-19	Day 2	HY	741	nl	R	R	N		2015-03-20	S2D3	HY	127	nl	L	N	N
2015-03-18	Day 1	HY	929	l	R	R	O		2015-03-19	Day 2	HY	89	nl	L	L	O		2015-03-20	S2D3	HY	921	l	N	N	N
2015-03-18	Day 1	HY	760	nl	N	L	O		2015-03-19	Day 2	HY	1134	nl	N	L	O		2015-03-20	S2D3	HY	39	nl	L	L	O
2015-03-18	Day 1	HY	741	nl	N	R	O		2015-03-19	Day 2	HY	124	nl	N	N	N		2015-03-20	S2D3	HY	948	nl	L	L	O
2015-03-18	Day 1	HY	1127	nl	N	R	O		2015-03-19	Day 2	HY	39	nl	L	L	O		2015-03-20	S2D3	HY	902	nl	N	R	N
2015-03-18	Day 1	HY	753	nl	N	N	N		2015-03-19	Day 2	HY	3	l	R	R	O		2015-03-20	S2D3	HY	760	nl	R	R	N
2015-03-18	Day 1	HY	1134	nl	N	N	D		2015-03-19	Day 2	HY	1089	l	N	N	N		2015-03-20	S2D3	HY	1063	nl	N	N	N
2015-03-18	Day 1	HY	34	l	N	R	O		2015-03-19	Day 2	LY	1035	nl	R	N	N		2015-03-20	S2D3	HY	1104	nl	R	R	D
2015-03-18	Day 1	HY	1144	nl	N	R	O		2015-03-19	Day 2	LY	297	nl	N	N	N		2015-03-20	S2D3	HY	1127	nl	N	N	N
2015-03-18	Day 1	HY	1089	l	R	R	O		2015-03-19	Day 2	LY	94	nl	N	N	N		2015-03-20	S2D3	HY	1134	nl	R	N	D
2015-03-18	Day 1	LY	9202	nl	R	R	O		2015-03-19	Day 2	LY	496	nl	N	N	D		2015-03-20	S2D3	HY	1144	nl	N	R	O
2015-03-18	Day 1	LY	94	nl	N	R	O		2015-03-19	Day 2	LY	53	l	N	N	N		2015-03-20	S2D3	HY	1089	l	N	L	O
2015-03-18	Day 1	LY	9236	nl	R	R	O		2015-03-19	Day 2	LY	559	l	N	R	O		2015-03-20	S2D3	LY	9156	nl	L	N	N
2015-03-18	Day 1	LY	297	nl	R	R	O		2015-03-19	Day 2	LY	260	nl	N	L	N		2015-03-20	S2D3	LY	260	nl	L	L	O
2015-03-18	Day 1	LY	951	l	N	L	D		2015-03-19	Day 2	LY	951	l	N	N	N		2015-03-20	S2D3	LY	111	nl	N	N	N
2015-03-18	Day 1	LY	496	nl	N	N	D		2015-03-19	Day 2	LY	121	nl	R	R	N		2015-03-20	S2D3	LY	1189	nl	N	N	N
2015-03-18	Day 1	LY	878	nl	N	N	D		2015-03-19	Day 2	LY	25	l	N	N	N		2015-03-20	S2D3	LY	25	nl	R	R	O
2015-03-18	Day 1	LY	9192	nl	N	N	N		2015-03-19	Day 2	LY	29	nl	N	N	N		2015-03-20	S2D3	LY	21	nl	N	N	N
2015-03-18	Day 1	LY	197	nl	R	R	O		2015-03-19	Day 2	LY	43	nl	N	L	O		2015-03-20	S2D3	LY	1047	nl	R	R	N
2015-03-18	Day 1	LY	25	l	R	R	O		2015-03-19	Day 2	LY	38	nl	R	L	O		2015-03-20	S2D3	LY	1035	nl	N	N	N
2015-03-18	Day 1	LY	923	l	N	R	O		2015-03-19	Day 2	LY	197	nl	N	L	N		2015-03-20	S2D3	LY	197	nl	L	L	N
2015-03-18	Day 1	LY	9142	nl	R	R	O		2015-03-19	Day 2	LY	9142	nl	R	R	N		2015-03-20	S2D3	LY	43	nl	N	N	N
2015-03-18	Day 1	LY	786	l	N	L	O		2015-03-19	Day 2	LY	9178	nl	N	N	N		2015-03-20	S2D3	LY	29	nl	N	N	N
2015-03-18	Day 1	LY	9156	nl	R	L	O		2015-03-19	Day 2	LY	9156	nl	N	N	N		2015-03-20	S2D3	LY	1036	nl	N	N	N
2015-03-18	Day 1	LY	43	nl	N	L	O		2015-03-19	Day 2	LY	108	nl	R	R	O		2015-03-20	S2D3	LY	9142	nl	R	N	N
2015-03-18	Day 1	LY	1036	nl	N	R	O		2015-03-19	Day 2	LY	1036	nl	R	R	O		2015-03-20	S2D3	LY	165	nl	N	R	N
2015-03-18	Day 1	LY	119	nl	R	R	O		2015-03-19	Day 2	LY	88	nl	N	N	N		2015-03-20	S2D3	LY	199	l	N	R	O
2015-03-18	Day 1	LY	983	l	N	R	D		2015-03-19	Day 2	LY	48	l	N	L	O		2015-03-20	S2D3	LY	108	nl	N	R	O
2015-03-18	Day 1	LY	260	nl	R	R	O		2015-03-19	Day 2	LY	69	nl	N	N	N		2015-03-20	S2D3	LY	94	nl	N	R	O
2015-03-18	Day 1	LY	48	l	N	N	N		2015-03-19	Day 2	LY	983	l	N	R	N		2015-03-20	S2D3	LY	119	nl	R	R	O
2015-03-18	Day 1	LY	29	nl	R	L	O		2015-03-19	Day 2	LY	119	nl	R	R	O		2015-03-20	S2D3	LY	48	l	L	N	N
2015-03-18	Day 1	LY	192	nl	N	R	O		2015-03-19	Day 2	LY	9202	nl	N	L	O		2015-03-20	S2D3	LY	121	nl	R	R	N
2015-03-18	Day 1	LY	1035	nl	R	L	O		2015-03-19	Day 2	LY	781	nl	R	N	N		2015-03-20	S2D3	LY	705	nl	N	L	O
2015-03-18	Day 1	LY	1047	nl	R	R	N		2015-03-19	Day 2	LY	146	nl	R	R	O		2015-03-20	S2D3	LY	195	nl	N	L	O
2015-03-18	Day 1	LY	21	nl	R	R	O		2015-03-19	Day 2	LY	680	l	R	R	N		2015-03-20	S2D3	LY	951	l	N	R	O
2015-03-18	Day 1	LY	88	nl	N	N	D		2015-03-19	Day 2	LY	189	nl	N	N	N		2015-03-20	S2D3	LY	9202	nl	L	R	O
2015-03-18	Day 1	LY	111	nl	N	R	O		2015-03-19	Day 2	LY	192	nl	N	N	N		2015-03-20	S2D3	LY	297	nl	N	N	N
2015-03-18	Day 1	LY	1189	nl	R	R	O		2015-03-19	Day 2	LY	878	nl	R	L	O		2015-03-20	S2D3	LY	1034	nl	N	N	N
2015-03-18	Day 1	LY	559	l	R	R	O		2015-03-19	Day 2	LY	199	l	N	N	N		2015-03-20	S2D3	LY	878	nl	N	N	N
2015-03-18	Day 1	LY	23	nl	N	R	O		2015-03-19	Day 2	LY	1034	nl	R	R	O		2015-03-20	S2D3	LY	559	l	N	R	O
2015-03-18	Day 1	LY	199	l	R	R	D		2015-03-19	Day 2	LY	195	nl	N	L	O		2015-03-20	S2D3	LY	496	nl	N	N	N
2015-03-18	Day 1	LY	485	nl	N	N	O		2015-03-19	Day 2	LY	1189	nl	N	L	N		2015-03-20	S2D3	LY	88	nl	N	N	N
2015-03-18	Day 1	LY	146	nl	R	R	O		2015-03-19	Day 2	LY	666	nl	R	R	N		2015-03-20	S2D3	LY	781	nl	N	N	N
2015-03-18	Day 1	LY	108	nl	R	R	O		2015-03-19	Day 2	LY	9141	l	N	N	N		2015-03-20	S2D3	LY	9141	l	R	R	N
2015-03-18	Day 1	LY	53	l	N	R	D		2015-03-19	Day 2	LY	23	nl	R	R	O		2015-03-20	S2D3	LY	38	nl	N	R	O
2015-03-18	Day 1	LY	165	nl	R	R	O		2015-03-19	Day 2	LY	129	nl	N	R	O		2015-03-20	S2D3	LY	1016	l	N	N	N
2015-03-18	Day 1	LY	680	l	R	R	O		2015-03-19	Day 2	LY	923	l	N	R	O		2015-03-20	S2D3	LY	983	l	N	N	N
2015-03-18	Day 1	LY	149	nl	N	R	O		2015-03-19	Day 2	LY	786	l	N	N	N		2015-03-20	S2D3	LY	680	l	R	R	N
2015-03-18	Day 1	LY	38	nl	R	L	O		2015-03-19	Day 2	LY	958	l	N	R	O		2015-03-20	S2D3	LY	1048	nl	R	R	O
2015-03-18	Day 1	LY	9141	l	R	R	D		2015-03-19	Day 2	LY	986	nl	N	N	O		2015-03-20	S2D3	LY	851	nl	N	R	N
2015-03-18	Day 1	LY	1034	nl	N	R	O		2015-03-19	Day 2	LY	485	nl	N	N	O		2015-03-20	S2D3	LY	9178	nl	N	N	N
2015-03-18	Day 1	LY	195	nl	R	R	O		2015-03-19	Day 2	LY	9174	nl	N	N	N		2015-03-20	S2D3	LY	786	l	N	R	O
2015-03-18	Day 1	LY	439	l	N	R	O		2015-03-19	Day 2	LY	705	nl	N	L	O		2015-03-20	S2D3	LY	923	l	N	L	O
2015-03-18	Day 1	LY	1012	nl	R	R	O		2015-03-19	Day 2	LY	1090	nl	N	L	O		2015-03-20	S2D3	LY	485	nl	N	N	N
2015-03-18	Day 1	LY	1016	l	N	R	O		2015-03-19	Day 2	LY	21	nl	N	N	N		2015-03-20	S2D3	LY	1012	nl	N	L	N
2015-03-18	Day 1	LY	958	l	R	R	O		2015-03-19	Day 2	LY	439	l	R	R	N		2015-03-20	S2D3	LY	9174	nl	N	N	N
2015-03-18	Day 1	LY	1002	nl	R	R	O		2015-03-19	Day 2	LY	149	nl	N	L	N		2015-03-20	S2D3	LY	110	nl	L	L	O
2015-03-18	Day 1	LY	847	nl	N	N	N		2015-03-19	Day 2	LY	9236	nl	N	N	N		2015-03-20	S2D3	LY	1090	nl	N	R	O
2015-03-18	Day 1	LY	69	nl	N	N	N		2015-03-19	Day 2	LY	950	nl	R	R	N		2015-03-20	S2D3	LY	146	nl	R	R	O
2015-03-18	Day 1	LY	110	nl	R	L	O		2015-03-19	Day 2	LY	1002	nl	N	R	O		2015-03-20	S2D3	LY	23	nl	N	N	N
2015-03-18	Day 1	LY	993	nl	R	R	O		2015-03-19	Day 2	LY	166	nl	R	R	N		2015-03-20	S2D3	LY	958	l	N	N	N
2015-03-18	Day 1	LY	851	nl	N	R	O		2015-03-19	Day 2	LY	110	nl	R	L	O		2015-03-20	S2D3	LY	9236	nl	N	N	N
2015-03-18	Day 1	LY	1039	l	N	R	O		2015-03-19	Day 2	LY	1016	l	N	N	N		2015-03-20	S2D3	LY	950	nl	R	R	N
2015-03-18	Day 1	LY	1042	nl	R	N	O		2015-03-19	Day 2	LY	993	nl	N	N	N		2015-03-20	S2D3	LY	192	nl	N	N	N
2015-03-18	Day 1	LY	1017	nl	N	R	O		2015-03-19	Day 2	LY	1012	nl	R	R	O		2015-03-20	S2D3	LY	993	nl	N	N	N
2015-03-18	Day 1	LY	950	nl	N	R	O		2015-03-19	Day 2	LY	1024	nl	R	R	N		2015-03-20	S2D3	LY	1039	l	N	L	O
2015-03-18	Day 1	LY	997	l	R	R	O		2015-03-19	Day 2	LY	165	nl	N	L	N		2015-03-20	S2D3	LY	1002	nl	N	R	O
2015-03-18	Day 1	LY	166	nl	R	R	O		2015-03-19	Day 2	LY	851	nl	N	R	O		2015-03-20	S2D3	LY	439	l	N	R	N
2015-03-18	Day 1	LY	129	nl	R	R	O		2015-03-19	Day 2	LY	1027	nl	N	N	N		2015-03-20	S2D3	LY	997	l	R	N	N
2015-03-18	Day 1	LY	9183	nl	R	L	O		2015-03-19	Day 2	LY	1049	nl	N	N	N		2015-03-20	S2D3	LY	1042	nl	N	N	N
2015-03-18	Day 1	LY	9178	nl	R	R	O		2015-03-19	Day 2	LY	1039	l	N	L	O		2015-03-20	S2D3	LY	166	nl	R	R	O
2015-03-18	Day 1	LY	1027	nl	N	R	O		2015-03-19	Day 2	LY	1017	nl	N	N	N		2015-03-20	S2D3	LY	129	nl	N	N	N
2015-03-18	Day 1	LY	705	nl	N	R	O		2015-03-19	Day 2	LY	919	nl	N	L	N		2015-03-20	S2D3	LY	986	nl	N	N	N
2015-03-18	Day 1	LY	1048	nl	N	L	D		2015-03-19	Day 2	LY	47	nl	N	N	N		2015-03-20	S2D3	LY	69	nl	N	N	N
2015-03-18	Day 1	LY	1090	nl	R	R	O		2015-03-19	Day 2	LY	708	nl	N	L	O		2015-03-20	S2D3	LY	1027	nl	N	N	N
2015-03-18	Day 1	LY	47	nl	R	R	O		2015-03-19	Day 2	LY	847	nl	N	N	N		2015-03-20	S2D3	LY	280	nl	N	N	N
2015-03-18	Day 1	LY	781	nl	R	R	N		2015-03-19	Day 2	LY	9186	nl	N	L	N		2015-03-20	S2D3	LY	666	nl	N	L	N
2015-03-18	Day 1	LY	121	nl	R	R	O		2015-03-19	Day 2	LY	1014	nl	N	N	D		2015-03-20	S2D3	LY	1017	nl	N	N	N
2015-03-18	Day 1	LY	919	nl	R	R	O		2015-03-19	Day 2	LY	1062	nl	N	R	O		2015-03-20	S2D3	LY	149	nl	N	N	N
2015-03-18	Day 1	LY	9186	nl	R	L	O		2015-03-19	Day 2	LY	9218	nl	N	R	O		2015-03-20	S2D3	LY	1040	l	N	N	N
2015-03-18	Day 1	LY	1014	nl	R	R	O		2015-03-19	Day 2	LY	283	nl	N	L	N		2015-03-20	S2D3	LY	847	nl	N	N	N
2015-03-18	Day 1	LY	1040	l	R	R	O		2015-03-19	Day 2	LY	1042	nl	R	L	O		2015-03-20	S2D3	LY	1014	nl	N	N	N
2015-03-18	Day 1	LY	708	nl	N	L	O		2015-03-19	Day 2	LY	142	l	N	N	N		2015-03-20	S2D3	LY	988	nl	N	N	N
2015-03-18	Day 1	LY	9167	nl	R	R	O		2015-03-19	Day 2	LY	111	nl	R	R	N		2015-03-20	S2D3	LY	708	nl	N	N	N
2015-03-18	Day 1	LY	1062	nl	R	R	O		2015-03-19	Day 2	LY	9183	nl	N	L	N		2015-03-20	S2D3	LY	9167	nl	N	R	N
2015-03-18	Day 1	LY	9218	nl	N	L	D		2015-03-19	Day 2	LY	1098	nl	R	R	N		2015-03-21	S2D3	LY	133	nl	N	N	N
2015-03-18	Day 1	LY	283	nl	R	R	O		2015-03-19	Day 2	LY	9167	nl	N	R	O		2015-03-22	S2D3	LY	9218	nl	N	R	D
2015-03-18	Day 1	LY	1049	nl	R	N	D		2015-03-19	Day 2	LY	1048	nl	N	R	O		2015-03-23	S2D3	LY	1097	nl	N	N	N
2015-03-18	Day 1	LY	666	nl	R	R	O		2015-03-19	Day 2	LY	9192	nl	N	L	N		2015-03-24	S2D3	LY	15	nl	N	N	N
2015-03-18	Day 1	LY	988	nl	N	N	D		2015-03-19	Day 2	LY	1040	l	N	R	O		2015-03-25	S2D3	LY	47	nl	N	N	N
2015-03-18	Day 1	LY	133	nl	N	R	O		2015-03-19	Day 2	LY	133	nl	N	N	N		2015-03-26	S2D3	LY	1024	nl	N	N	N
2015-03-18	Day 1	LY	1024	nl	R	R	O		2015-03-19	Day 2	LY	1112	nl	N	R	O		2015-03-27	S2D3	LY	142	l	N	N	N
2015-03-18	Day 1	LY	142	l	N	R	O		2015-03-19	Day 2	LY	988	nl	N	N	O		2015-03-28	S2D3	LY	283	nl	N	N	N
2015-03-18	Day 1	LY	1098	nl	N	L	O											2015-03-29	S2D3	LY	9183	nl	N	N	N
2015-03-18	Day 1	LY	15	nl	R	R	O											2015-03-30	S2D3	LY	1098	nl	N	R	N
2015-03-18	Day 1	LY	1112	nl	N	L	O											2015-03-31	S2D3	LY	9192	nl	N	N	N
																		2015-04-01	S2D3	LY	1112	nl	N	N	N
																		2015-04-02	S2D3	LY	1049	nl	N	N	N
																		2015-04-03	S2D3	LY	1062	nl	R	R	O
																		2015-04-05	S2D3	LY	919	nl	N	N	O

## Sheet: central kong
central kong day 1 (n = 137)									central kong day 2 (n = 154)									central kong day 3 (n = 153 )									legend
date	day	group	cow number	mobility	Eyes	Nostril	Stop position		date	day	group	cow number	mobility	Eyes	Nostril	Stop position		date	day	group	cow number	mobility	Eyes	Nostril	Stop position
2015-03-25	Day 1	HY	970	nl	N	R	O		2015-03-26	Day 2	HY	979	nl	N	0	D		2015-03-27	Day 3	HY	944	nl	R	R	O		group
2015-03-25	Day 1	HY	89	nl	N	L	D		2015-03-26	Day 2	HY	922	l	R	L	O		2015-03-27	Day 3	HY	285	nl	N	0	D		HY	high yielding cow
2015-03-25	Day 1	HY	448	nl	N	B	D		2015-03-26	Day 2	HY	764	l	N	B	O		2015-03-27	Day 3	HY	955	nl	N	0	N		LY	low yielding cow
2015-03-25	Day 1	HY	9208	nl	N	0	D		2015-03-26	Day 2	HY	56	l	N	0	D		2015-03-27	Day 3	HY	785	nl	N	0	N		mobility
2015-03-25	Day 1	HY	9689	l	N	L	D		2015-03-26	Day 2	HY	45	nl	N	0	D		2015-03-27	Day 3	HY	497	l	N	0	N		nl	non-lame
2015-03-25	Day 1	HY	739	nl	L	L	D		2015-03-26	Day 2	HY	953	l	N	0	N		2015-03-27	Day 3	HY	742	nl	N	0	D		l	lame
2015-03-25	Day 1	HY	158	nl	N	B	D		2015-03-26	Day 2	HY	518	nl	N	B	O		2015-03-27	Day 3	HY	169	nl	N	0	N		Eye orientation
2015-03-25	Day 1	HY	687	l	L	0	D		2015-03-26	Day 2	HY	177	nl	N	0	D		2015-03-27	Day 3	HY	922	l	N	0	N		B	both eyes
2015-03-25	Day 1	HY	90	nl	N	L	D		2015-03-26	Day 2	HY	89	nl	L	L	O		2015-03-27	Day 3	HY	943	nl	N	0	N		R	right eye
2015-03-25	Day 1	HY	925	l	L	L	O		2015-03-26	Day 2	HY	1151	nl	L	L	O		2015-03-27	Day 3	HY	1127	nl	N	0	N		L	left eye
2015-03-25	Day 1	HY	1144	nl	N	R	D		2015-03-26	Day 2	HY	312	l	L	0	D		2015-03-27	Day 3	HY	739	nl	L	0	N		Contact (with object)
2015-03-25	Day 1	HY	929	l	R	R	D		2015-03-26	Day 2	HY	285	nl	R	R	O		2015-03-27	Day 3	HY	862	nl	N	0	N		0	no contact with objects
2015-03-25	Day 1	HY	501	nl	N	0	O		2015-03-26	Day 2	HY	702	nl	R	0	N		2015-03-27	Day 3	HY	282	nl	N	0	N		B	contact using both nostrils
2015-03-25	Day 1	HY	178	l	N	B	D		2015-03-26	Day 2	HY	788	l	L	0	N		2015-03-27	Day 3	HY	948	l	R	R	N		R	contact using right nostril
2015-03-25	Day 1	HY	164	l	N	0	D		2015-03-26	Day 2	HY	1114	nl	L	0	D		2015-03-27	Day 3	HY	788	l	N	0	N		L	contact using left nostril
2015-03-25	Day 1	HY	862	nl	N	B	D		2015-03-26	Day 2	HY	1052	nl	L	0	N		2015-03-27	Day 3	HY	764	l	L	L	O		stop position
2015-03-25	Day 1	HY	785	nl	N	R	O		2015-03-26	Day 2	HY	785	nl	N	0	N		2015-03-27	Day 3	HY	284	nl	L	B	D		N	no stop
2015-03-25	Day 1	HY	922	l	N	B	O		2015-03-26	Day 2	HY	178	l	R	R	O		2015-03-27	Day 3	HY	161	nl	L	0	N		O	stop at objects
2015-03-25	Day 1	HY	137	nl	N	R	O		2015-03-26	Day 2	HY	962	l	N	B	O		2015-03-27	Day 3	HY	857	l	N	0	N		D	stop at distance to objects
2015-03-25	Day 1	HY	788	l	N	B	D		2015-03-26	Day 2	HY	1121	l	N	0	N		2015-03-27	Day 3	HY	72	nl	L	0	N
2015-03-25	Day 1	HY	764	l	N	L	O		2015-03-26	Day 2	HY	9163	nl	N	0	N		2015-03-27	Day 3	HY	9144	nl	R	B	D
2015-03-25	Day 1	HY	45	nl	N	0	N		2015-03-26	Day 2	HY	501	nl	N	0	D		2015-03-27	Day 3	HY	501	nl	N	0	N
2015-03-25	Day 1	HY	962	l	N	L	D		2015-03-26	Day 2	HY	739	nl	L	0	N		2015-03-27	Day 3	HY	929	l	N	0	N
2015-03-25	Day 1	HY	1052	nl	N	L	D		2015-03-26	Day 2	HY	762	l	L	L	D		2015-03-27	Day 3	HY	56	l	N	0	D
2015-03-25	Day 1	HY	979	nl	N	B	D		2015-03-26	Day 2	HY	749	nl	N	L	O		2015-03-27	Day 3	HY	9689	l	N	0	D
2015-03-25	Day 1	HY	18	nl	L	B	O		2015-03-26	Day 2	HY	9689	l	N	L	D		2015-03-27	Day 3	HY	1075	nl	N	B	N
2015-03-25	Day 1	HY	793	l	L	B	O		2015-03-26	Day 2	HY	862	nl	L	0	N		2015-03-27	Day 3	HY	45	nl	N	0	N
2015-03-25	Day 1	HY	902	nl	N	B	D		2015-03-26	Day 2	HY	497	l	L	B	D		2015-03-27	Day 3	HY	90	nl	N	L	O
2015-03-25	Day 1	HY	312	l	N	0	O		2015-03-26	Day 2	HY	857	l	N	0	N		2015-03-27	Day 3	HY	158	nl	R	B	O
2015-03-25	Day 1	HY	162	nl	N	L	O		2015-03-26	Day 2	HY	124	nl	N	B	D		2015-03-27	Day 3	HY	178	l	N	0	N
2015-03-25	Day 1	HY	702	nl	N	L	D		2015-03-26	Day 2	HY	146	nl	N	0	N		2015-03-27	Day 3	HY	793	l	N	0	N
2015-03-25	Day 1	HY	26	l	R	L	O		2015-03-26	Day 2	HY	742	nl	N	R	O		2015-03-27	Day 3	HY	162	nl	L	B	N
2015-03-25	Day 1	HY	285	nl	N	0	D		2015-03-26	Day 2	HY	931	nl	N	B	O		2015-03-27	Day 3	HY	702	nl	N	0	N
2015-03-25	Day 1	HY	1121	l	N	0	D		2015-03-26	Day 2	HY	793	l	N	B	O		2015-03-27	Day 3	HY	969	nl	R	R	O
2015-03-25	Day 1	HY	953	l	N	0	N		2015-03-26	Day 2	HY	943	nl	N	0	N		2015-03-27	Day 3	HY	312	l	N	0	N
2015-03-25	Day 1	HY	177	nl	N	L	O		2015-03-26	Day 2	HY	137	nl	N	0	N		2015-03-27	Day 3	HY	3	l	N	L	N
2015-03-25	Day 1	HY	944	nl	N	0	N		2015-03-26	Day 2	HY	902	nl	L	0	N		2015-03-27	Day 3	HY	9163	nl	N	0	N
2015-03-25	Day 1	HY	749	nl	L	R	O		2015-03-26	Day 2	HY	757	l	R	0	O		2015-03-27	Day 3	HY	1121	l	N	0	N
2015-03-25	Day 1	HY	969	nl	N	B	O		2015-03-26	Day 2	HY	955	nl	N	0	N		2015-03-27	Day 3	HY	448	nl	N	0	N
2015-03-25	Day 1	HY	9144	nl	R	L	D		2015-03-26	Day 2	HY	18	nl	N	0	N		2015-03-27	Day 3	HY	28	nl	N	0	N
2015-03-25	Day 1	HY	497	l	L	0	D		2015-03-26	Day 2	HY	72	nl	L	L	D		2015-03-27	Day 3	HY	962	l	N	B	N
2015-03-25	Day 1	HY	757	l	N	0	N		2015-03-26	Day 2	HY	291	l	N	0	D		2015-03-27	Day 3	HY	26	l	N	B	D
2015-03-25	Day 1	HY	955	nl	L	L	D		2015-03-26	Day 2	HY	125	nl	N	0	D		2015-03-27	Day 3	HY	1052	nl	N	0	N
2015-03-25	Day 1	HY	1114	nl	N	R	D		2015-03-26	Day 2	HY	26	l	R	B	D		2015-03-27	Day 3	HY	34	l	N	R	D
2015-03-25	Day 1	HY	921	l	N	B	O		2015-03-26	Day 2	HY	9208	nl	N	0	D		2015-03-27	Day 3	HY	30	l	L	L	O
2015-03-25	Day 1	HY	72	nl	N	L	O		2015-03-26	Day 2	HY	9144	nl	L	L	D		2015-03-27	Day 3	HY	410	nl	N	0	N
2015-03-25	Day 1	HY	18	nl	R	L	O		2015-03-26	Day 2	HY	1057	nl	N	0	N		2015-03-27	Day 3	HY	418	nl	N	0	O
2015-03-25	Day 1	HY	943	nl	L	B	O		2015-03-26	Day 2	HY	448	nl	R	R	D		2015-03-27	Day 3	HY	190	nl	N	0	N
2015-03-25	Day 1	HY	9386	nl	R	B	O		2015-03-26	Day 2	HY	28	nl	N	0	N		2015-03-27	Day 3	HY	1144	nl	L	R	N
2015-03-25	Day 1	HY	753	nl	N	0	N		2015-03-26	Day 2	HY	9386	nl	N	0	N		2015-03-27	Day 3	HY	9386	nl	N	0	N
2015-03-25	Day 1	HY	9163	nl	N	B	D		2015-03-26	Day 2	HY	162	nl	N	0	N		2015-03-27	Day 3	HY	757	l	N	0	N
2015-03-25	Day 1	HY	284	nl	N	0	D		2015-03-26	Day 2	HY	418	nl	N	B	D		2015-03-27	Day 3	HY	1082	nl	N	0	N
2015-03-25	Day 1	HY	291	l	N	B	D		2015-03-26	Day 2	HY	190	nl	L	0	D		2015-03-27	Day 3	HY	687	l	N	0	D
2015-03-25	Day 1	HY	141	nl	N	R	O		2015-03-26	Day 2	HY	3	l	R	B	O		2015-03-27	Day 3	HY	9204	nl	N	R	D
2015-03-25	Day 1	HY	282	nl	N	0	D		2015-03-26	Day 2	HY	30	l	R	R	D		2015-03-27	Day 3	HY	921	l	N	0	N
2015-03-25	Day 1	HY	3	l	N	R	O		2015-03-26	Day 2	HY	34	l	N	R	O		2015-03-27	Day 3	HY	902	nl	N	0	N
2015-03-25	Day 1	HY	56	l	N	0	D		2015-03-26	Day 2	HY	282	nl	N	0	N		2015-03-27	Day 3	HY	1114	nl	N	0	N
2015-03-25	Day 1	HY	30	l	N	R	O		2015-03-26	Day 2	HY	944	nl	L	0	N		2015-03-27	Day 3	HY	291	l	N	0	N
2015-03-25	Day 1	HY	1075	nl	L	L	O		2015-03-26	Day 2	HY	687	l	N	0	N		2015-03-27	Day 3	HY	18	nl	N	0	N
2015-03-25	Day 1	HY	1082	nl	N	L	O		2015-03-26	Day 2	HY	577	nl	L	0	N		2015-03-27	Day 3	HY	127	nl	N	0	N
2015-03-25	Day 1	HY	1063	nl	R	R	D		2015-03-26	Day 2	HY	141	nl	L	R	N		2015-03-27	Day 3	HY	9208	nl	L	R	O
2015-03-25	Day 1	HY	857	l	N	0	D		2015-03-26	Day 2	HY	741	nl	N	0	N		2015-03-27	Day 3	HY	125	nl	N	0	N
2015-03-25	Day 1	HY	1079	nl	N	R	D		2015-03-26	Day 2	HY	760	nl	N	0	D		2015-03-27	Day 3	HY	164	l	N	B	D
2015-03-25	Day 1	HY	39	l	N	0	D		2015-03-26	Day 2	HY	1104	nl	R	R	D		2015-03-27	Day 3	HY	1079	nl	N	0	N
2015-03-25	Day 1	HY	34	l	N	R	D		2015-03-26	Day 2	HY	921	l	R	B	O		2015-03-27	Day 3	HY	124	nl	L	L	D
2015-03-25	Day 1	HY	1104	nl	N	B	D		2015-03-26	Day 2	HY	929	l	N	0	N		2015-03-27	Day 3	HY	760	nl	L	0	N
2015-03-25	Day 1	HY	190	nl	L	L	D		2015-03-26	Day 2	HY	1144	nl	L	L	D		2015-03-27	Day 3	HY	1062	nl	N	0	N
2015-03-25	Day 1	HY	1134	nl	N	0	D		2015-03-26	Day 2	HY	1079	nl	N	0	D		2015-03-27	Day 3	HY	741	nl	N	0	N
2015-03-25	Day 1	HY	124	nl	N	0	D		2015-03-26	Day 2	HY	1075	nl	N	R	O		2015-03-27	Day 3	HY	753	nl	N	0	N
2015-03-25	Day 1	HY	1127	nl	N	0	D		2015-03-26	Day 2	HY	169	nl	N	0	O		2015-03-27	Day 3	HY	1104	nl	N	B	O
2015-03-25	Day 1	HY	1089	nl	N	L	D		2015-03-26	Day 2	HY	1082	nl	N	0	D		2015-03-27	Day 3	HY	39	l	N	0	D
2015-03-25	Day 1	LY	9156	nl	N	L	D		2015-03-26	Day 2	HY	1063	nl	R	0	O		2015-03-27	Day 3	HY	1089	nl	R	0	N
2015-03-25	Day 1	LY	297	nl	N	0	N		2015-03-26	Day 2	HY	1134	nl	N	0	N		2015-03-27	Day 3	LY	9142	nl	N	0	D
2015-03-25	Day 1	LY	1017	l	N	0	D		2015-03-26	Day 2	HY	1127	nl	N	0	N		2015-03-27	Day 3	LY	43	nl	N	0	N
2015-03-25	Day 1	LY	25	l	N	R	D		2015-03-26	Day 2	HY	127	nl	L	B	O		2015-03-27	Day 3	LY	94	nl	N	0	N
2015-03-25	Day 1	LY	189	l	L	L	D		2015-03-26	Day 2	HY	39	l	N	0	D		2015-03-27	Day 3	LY	297	nl	N	0	N
2015-03-25	Day 1	LY	950	nl	L	L	O		2015-03-26	Day 2	HY	1089	nl	N	0	D		2015-03-27	Day 3	LY	48	l	N	0	D
2015-03-25	Day 1	LY	29	l	N	B	D		2015-03-26	Day 2	LY	94	nl	L	B	O		2015-03-27	Day 3	LY	199	l	L	R	O
2015-03-25	Day 1	LY	43	nl	N	0	N		2015-03-26	Day 2	LY	1061	nl	L	B	O		2015-03-27	Day 3	LY	9192	nl	N	0	N
2015-03-25	Day 1	LY	9236	nl	N	0	O		2015-03-26	Day 2	LY	9262	nl	L	L	N		2015-03-27	Day 3	LY	979	nl	N	0	N
2015-03-25	Day 1	LY	108	nl	R	0	D		2015-03-26	Day 2	LY	1034	nl	R	B	O		2015-03-27	Day 3	LY	983	nl	N	0	N
2015-03-25	Day 1	LY	199	l	N	L	D		2015-03-26	Day 2	LY	1036	nl	L	0	N		2015-03-27	Day 3	LY	119	nl	L	L	O
2015-03-25	Day 1	LY	21	l	N	B	O		2015-03-26	Day 2	LY	48	l	N	0	N		2015-03-27	Day 3	LY	260	nl	R	B	O
2015-03-25	Day 1	LY	119	nl	N	B	D		2015-03-26	Day 2	LY	923	l	N	0	O		2015-03-27	Day 3	LY	1036	nl	L	B	O
2015-03-25	Day 1	LY	1036	nl	L	L	O		2015-03-26	Day 2	LY	119	nl	N	R	N		2015-03-27	Day 3	LY	151	nl	L	B	D
2015-03-25	Day 1	LY	983	nl	L	L	D		2015-03-26	Day 2	LY	121	nl	L	B	O		2015-03-27	Day 3	LY	496	l	N	R	O
2015-03-25	Day 1	LY	9141	l	L	0	D		2015-03-26	Day 2	LY	38	nl	L	L	D		2015-03-27	Day 3	LY	89	nl	R	0	O
2015-03-25	Day 1	LY	111	nl	R	R	N		2015-03-26	Day 2	LY	29	l	N	R	O		2015-03-27	Day 3	LY	878	nl	N	0	N
2015-03-25	Day 1	LY	121	nl	R	0	D		2015-03-26	Day 2	LY	297	nl	N	0	N		2015-03-27	Day 3	LY	1189	l	N	0	N
2015-03-25	Day 1	LY	9120	nl	N	0	D		2015-03-26	Day 2	LY	496	l	N	B	O		2015-03-27	Day 3	LY	29	l	R	R	O
2015-03-25	Day 1	LY	496	nl	N	0	D		2015-03-26	Day 2	LY	1035	nl	N	0	N		2015-03-27	Day 3	LY	9156	nl	N	0	N
2015-03-25	Day 1	LY	559	nl	R	L	D		2015-03-26	Day 2	LY	43	nl	N	0	N		2015-03-27	Day 3	LY	195	nl	N	0	N
2015-03-25	Day 1	LY	197	l	N	B	O		2015-03-26	Day 2	LY	951	nl	L	0	N		2015-03-27	Day 3	LY	38	nl	N	0	D
2015-03-25	Day 1	LY	1035	nl	N	B	O		2015-03-26	Day 2	LY	197	l	N	0	N		2015-03-27	Day 3	LY	9120	nl	L	B	D
2015-03-25	Day 1	LY	9202	nl	N	L	D		2015-03-26	Day 2	LY	88	nl	N	0	N		2015-03-27	Day 3	LY	1047	nl	N	0	D
2015-03-25	Day 1	LY	1189	l	N	B	O		2015-03-26	Day 2	LY	9156	nl	N	0	N		2015-03-27	Day 3	LY	781	nl	L	0	N
2015-03-25	Day 1	LY	951	nl	N	R	O		2015-03-26	Day 2	LY	680	nl	N	L	D		2015-03-27	Day 3	LY	749	nl	N	0	N
2015-03-25	Day 1	LY	923	l	N	L	O		2015-03-26	Day 2	LY	1017	l	N	0	D		2015-03-27	Day 3	LY	23	nl	N	0	D
2015-03-25	Day 1	LY	88	nl	N	B	D		2015-03-26	Day 2	LY	9120	nl	N	0	D		2015-03-27	Day 3	LY	108	nl	R	R	O
2015-03-25	Day 1	LY	53	l	N	B	O		2015-03-26	Day 2	LY	9142	nl	N	B	D		2015-03-27	Day 3	LY	9141	l	L	0	N
2015-03-25	Day 1	LY	1002	l	N	L	O		2015-03-26	Day 2	LY	9236	nl	N	0	N		2015-03-27	Day 3	LY	786	l	L	B	N
2015-03-25	Day 1	LY	195	nl	N	B	D		2015-03-26	Day 2	LY	559	nl	L	R	O		2015-03-27	Day 3	LY	485	l	N	0	N
2015-03-25	Day 1	LY	705	nl	N	L	D		2015-03-26	Day 2	LY	53	l	N	0	N		2015-03-27	Day 3	LY	680	nl	N	0	N
2015-03-25	Day 1	LY	48	l	L	0	O		2015-03-26	Day 2	LY	1047	nl	N	R	D		2015-03-27	Day 3	LY	559	nl	L	0	N
2015-03-25	Day 1	LY	786	l	N	B	D		2015-03-26	Day 2	LY	1189	l	L	L	O		2015-03-27	Day 3	LY	851	l	N	R	D
2015-03-25	Day 1	LY	110	nl	N	B	D		2015-03-26	Day 2	LY	439	nl	N	0	N		2015-03-27	Day 3	LY	923	l	R	R	O
2015-03-25	Day 1	LY	146	nl	N	B	O		2015-03-26	Day 2	LY	146	nl	N	L	O		2015-03-27	Day 3	LY	951	nl	N	0	N
2015-03-25	Day 1	LY	485	l	N	0	D		2015-03-26	Day 2	LY	983	nl	N	0	N		2015-03-27	Day 3	LY	25	l	N	0	N
2015-03-25	Day 1	LY	69	l	N	R	D		2015-03-26	Day 2	LY	878	nl	N	0	D		2015-03-27	Day 3	LY	1034	nl	N	0	N
2015-03-25	Day 1	LY	993	nl	N	L	O		2015-03-26	Day 2	LY	1016	l	N	L	O		2015-03-27	Day 3	LY	21	l	N	0	N
2015-03-25	Day 1	LY	847	nl	N	B	D		2015-03-26	Day 2	LY	781	nl	N	0	N		2015-03-27	Day 3	LY	165	nl	N	R	N
2015-03-25	Day 1	LY	680	nl	L	L	D		2015-03-26	Day 2	LY	21	l	N	0	N		2015-03-27	Day 3	LY	9202	nl	L	0	N
2015-03-25	Day 1	LY	192	nl	R	R	D		2015-03-26	Day 2	LY	69	l	N	R	O		2015-03-27	Day 3	LY	149	l	N	0	N
2015-03-25	Day 1	LY	149	l	L	B	O		2015-03-26	Day 2	LY	851	l	N	R	D		2015-03-27	Day 3	LY	47	nl	L	R	D
2015-03-25	Day 1	LY	1016	l	N	0	D		2015-03-26	Day 2	LY	485	l	N	0	N		2015-03-27	Day 3	LY	121	nl	N	B	N
2015-03-25	Day 1	LY	439	nl	R	0	N		2015-03-26	Day 2	LY	260	nl	N	B	D		2015-03-27	Day 3	LY	1042	l	R	0	D
2015-03-25	Day 1	LY	9183	nl	N	R	D		2015-03-26	Day 2	LY	950	nl	L	L	N		2015-03-27	Day 3	LY	993	nl	N	0	N
2015-03-25	Day 1	LY	1061	nl	N	B	O		2015-03-26	Day 2	LY	23	nl	L	L	N		2015-03-27	Day 3	LY	88	nl	N	0	D
2015-03-25	Day 1	LY	9178	nl	N	B	O		2015-03-26	Day 2	LY	25	l	N	0	N		2015-03-27	Day 3	LY	439	nl	L	0	N
2015-03-25	Day 1	LY	958	l	N	L	O		2015-03-26	Day 2	LY	1042	l	N	0	D		2015-03-27	Day 3	LY	146	nl	N	B	D
2015-03-25	Day 1	LY	1049	nl	N	0	O		2015-03-26	Day 2	LY	108	nl	L	L	O		2015-03-27	Day 3	LY	129	nl	N	0	N
2015-03-25	Day 1	LY	38	nl	N	R	D		2015-03-26	Day 2	LY	129	nl	N	B	D		2015-03-27	Day 3	LY	9178	nl	N	0	N
2015-03-25	Day 1	LY	986	nl	N	0	D		2015-03-26	Day 2	LY	166	nl	L	L	O		2015-03-27	Day 3	LY	53	l	N	0	N
2015-03-25	Day 1	LY	9192	nl	L	0	N		2015-03-26	Day 2	LY	9141	l	N	0	N		2015-03-27	Day 3	LY	950	nl	L	0	N
2015-03-25	Day 1	LY	9186	nl	R	R	O		2015-03-26	Day 2	LY	1002	l	N	B	O		2015-03-27	Day 3	LY	1012	nl	N	R	O
2015-03-25	Day 1	LY	708	nl	L	L	O		2015-03-26	Day 2	LY	705	nl	N	0	D		2015-03-27	Day 3	LY	986	nl	N	0	N
2015-03-25	Day 1	LY	15	nl	L	B	D		2015-03-26	Day 2	LY	195	nl	N	B	D		2015-03-27	Day 3	LY	705	nl	N	0	D
2015-03-25	Day 1	LY	919	nl	L	B	O		2015-03-26	Day 2	LY	1012	nl	N	B	O		2015-03-27	Day 3	LY	1016	l	R	R	O
2015-03-25	Day 1	LY	9218	nl	L	B	D		2015-03-26	Day 2	LY	986	nl	R	B	O		2015-03-27	Day 3	LY	166	nl	N	B	O
2015-03-25	Day 1	LY	155	nl	L	L	D		2015-03-26	Day 2	LY	9174	nl	N	0	N		2015-03-27	Day 3	LY	1035	nl	N	0	N
2015-03-25	Day 1	LY	283	nl	R	L	O		2015-03-26	Day 2	LY	283	nl	L	L	N		2015-03-27	Day 3	LY	1061	nl	N	0	N
2015-03-25	Day 1	LY	133	nl	N	L	O		2015-03-26	Day 2	LY	111	nl	N	0	N		2015-03-27	Day 3	LY	69	l	N	0	N
2015-03-25	Day 1	LY	1027	nl	R	B	O		2015-03-26	Day 2	LY	708	nl	R	R	O		2015-03-27	Day 3	LY	192	nl	N	0	N
2015-03-25	Day 1	LY	1112	nl	N	0	D		2015-03-26	Day 2	LY	192	nl	L	L	O		2015-03-27	Day 3	LY	9186	nl	N	0	N
2015-03-25	Day 1	LY	142	l	L	L	D		2015-03-26	Day 2	LY	847	nl	L	0	N		2015-03-27	Day 3	LY	283	nl	L	0	N
2015-03-25	Day 1	LY	1062	nl	N	B	D		2015-03-26	Day 2	LY	199	l	N	B	O		2015-03-27	Day 3	LY	1002	l	L	B	O
2015-03-25	Day 1	LY	1042	l	R	L	O		2015-03-26	Day 2	LY	149	l	R	R	O		2015-03-27	Day 3	LY	9167	nl	N	L	O
									2015-03-26	Day 2	LY	993	nl	N	0	N		2015-03-27	Day 3	LY	1027	nl	N	0	D
									2015-03-26	Day 2	LY	47	nl	N	0	N		2015-03-27	Day 3	LY	1040	nl	L	L	D
									2015-03-26	Day 2	LY	9178	nl	N	B	N		2015-03-27	Day 3	LY	1024	nl	N	0	D
									2015-03-26	Day 2	LY	9167	nl	N	B	D		2015-03-27	Day 3	LY	9183	nl	N	0	N
									2015-03-26	Day 2	LY	1048	nl	L	L	D		2015-03-27	Day 3	LY	9218	nl	L	0	O
									2015-03-26	Day 2	LY	133	nl	N	B	N		2015-03-27	Day 3	LY	155	nl	N	0	D
									2015-03-26	Day 2	LY	1027	nl	N	0	N		2015-03-27	Day 3	LY	1049	nl	N	0	N
									2015-03-26	Day 2	LY	9218	nl	L	L	D		2015-03-27	Day 3	LY	110	nl	N	0	O
									2015-03-26	Day 2	LY	155	nl	L	L	N		2015-03-27	Day 3	LY	708	nl	N	0	D
									2015-03-26	Day 2	LY	151	nl	N	B	D		2015-03-27	Day 3	LY	15	nl	N	0	D
									2015-03-26	Day 2	LY	786	l	L	L	D		2015-03-27	Day 3	LY	142	l	N	0	N
									2015-03-26	Day 2	LY	9186	nl	N	0	D		2015-03-27	Day 3	LY	133	nl	N	0	N
									2015-03-26	Day 2	LY	919	nl	N	0	N		2015-03-27	Day 3	LY	1097	nl	N	0	N
									2015-03-26	Day 2	LY	110	nl	N	0	N		2015-03-27	Day 3	LY	1062	nl	N	B	N
									2015-03-26	Day 2	LY	142	l	N	0	N		2015-03-27	Day 3	LY	1017	l	N	R	D
									2015-03-26	Day 2	LY	1112	nl	N	0	N		2015-03-27	Day 3	LY	1112	nl	N	0	N
									2015-03-26	Day 2	LY	1062	nl	L	L	N
